# Supplementary material
Source: publisher figshare collection journal article supplement (https://frontiersin.figshare.com/ndownloader/files/30977617)
Supplement: Supplementary file 1 [file 30977617]

| gear | **ROV** | | | | | | |  | **EBS** | | | | | |  | **vV** | | | | | |  |
| --- | --- | --- | --- | --- | --- | --- | --- | --- | --- | --- | --- | --- | --- | --- | --- | --- | --- | --- | --- | --- | --- | --- |
| station/sample | 4/2* | 4/6* | 212/4* | 228/1* | 228/2 | 228/6 | 228/7 |  | 7 | 9 | 18 | 216 | 219 | 225 |  | 8 | 17 | 215 | 217 | 222 | 224 | Total |
| Alplacophora | - | - | 4 | - | - | - | - |  | 49 | - | - | 4 | - | 7 |  | - | - | 2 | 4 | 2 | 2 | 74 |
| Anatomidae | 2 | 1 | 1 | - | - | - | 1 |  | 92 | 2 | - | 13 | - | - |  | - | - | - | - | - | - | 112 |
| Arcidae | 1 | 2 | - | - | - | - | - |  | 1 | - | - | 1 | - | 6 |  | - | - | - | 1 | - | 4 | 16 |
| Astartidae | - | 3 | - | - | - | - | - |  | 55 | - | - | 1 | - | - |  | - | - | 1 | - | 1 | 4 | 65 |
| Bivalvia | - | - | - | - | - | - | - |  | - | - | - | - | 3 | - |  | - | 7 | 5 | 3 | 5 | - | 23 |
| Buccinidae | - | - | - | 1 | - | - | - |  | - | - | - | - | - | - |  | - | - | - | - | - | - | 1 |
| Cancellariidae | - | - | - | - | - | - | - |  | 1 | - | - | - | - | - |  | - | - | - | - | - | - | 1 |
| Cardiidae | - | - | - | - | - | - | - |  | 7 | - | - | 77 | - | 89 |  | - | - | 20 | 6 | - | 10 | 209 |
| Cimidae | - | - | 2 | 1 | 1 | - | - |  | 3 | - | - | - | - | - |  | - | 1 | - | - | - | - | 8 |
| Cuspidariidae | - | - | - |  | - | - | - |  | 13 | - | 1 | 4 | - | 1 |  | - | - | - | - | 2 | - | 21 |
| Cylichnidae | - | - | - | - | - | - | - |  | 2 | - | - | - | - | - |  | - | - | - | - | - | - | 2 |
| Dentaliidae | - | - | - | - | - | - | - |  | 6 | - | - | - | - | 1 |  | - | - | 12 | - | 1 | 1 | 21 |
| Eulimidae | - | - | - | - | - | - | - |  | 2 | - | - | - | - | - |  | - | - | - | - | - | - | 2 |
| Fissurellidae | 1 | - | - | - | - | - | - |  | 1 | - | - | - | - | - |  | - | - | - | - | - | - | 2 |
| Gadilidae | - | - | - | - | - | - | - |  | 92 | - | - | 30 | - | 18 |  | - | 1 | - | 1 | 18 | 5 | 165 |
| Lepetidae | - | - | - | - | - | - | - |  | 3 | - | - | - | - | - |  | - | - | - | - | - | - | 3 |
| Leptochitonidae | - | - | - | - | - | 1 | - |  | 17 | - | - | - | - | - |  | - | 2 | - | - | - | - | 20 |
| Limidae | - | 4 | - | - | - | - | - |  | 47 | 1 | - | 3 | - | 1 |  | - | - | - | - | - | 1 | 57 |
| Limopsidae | - | - | - | - | - | - | - |  | - | - | - | - | - | - |  | - | - | - | 1 | - | - | 1 |
| Lyonsiellidae | - | - | - | - | - | - | - |  | 4 | - | - | 1 | - | - |  | - | - | - | - | 1 | - | 6 |
| Mangeliidae | - | - | - | - | - | - | - |  | - | - | - | - | - | - |  | 1 | - | - | - | - | - | 1 |
| Montacutidae | - | - | - | - | - | - | - |  | 1 | - | - | - | - | - |  | - | - | - | - | - | - | 1 |
| Mytilidae | - | 4 | - | - | - | - | - |  | 2 | - | - | 5 | - | 3 |  | - | 2 | 2 | 3 | - | - | 21 |
| Naticidae | - | - | - | - | - | - | - |  | 2 | - | - | 1 | - | - |  | - | - | - | 1 | 1 | - | 5 |
| Nuculidae | - | - | - | - | - | - | - |  | - | - | - | - | - | - |  | - | - | - | - | 1 | - | 1 |
| Nudibranchia | - | - | - | - | - | - | - |  | 5 | - | - | - | - | - |  | - | - | - | - | - | - | 5 |
| Pectinidae | - | - | - | - | - | - | 1 |  | - | - | - | - | - | 1 |  | - | - | - | - | - | 1 | 3 |
| Philinidae | - | - | - | - | - | - | - |  | - | - | - | - | 1 | - |  | - | - | - | - | - | - | 1 |
| Pseudococculinidae | - | 1 | - | - | - | - | - |  | - | - | - | - | - | - |  | - | - | - | - | - | - | 1 |
| Propeamussiidae | - | - | - | - | - | - | - |  | 11 |  | - | 38 | - | 6 |  | - | - | 2 | - | 1 | - | 58 |
| Rissoidae | - | - | - | - | - | - | - |  | 9 | 1 | - | - | - | - |  | - | - | - | - | - | - | 10 |
| Semelidae | - | - | - | - | - | - | - |  | - | - | - | - | - | - |  | - | - | - | - | - | 2 | 2 |
| Skeneidae | - | 13 | - | - | 1 | 1 | - |  | 150 | 1 | - | 2 | 1 | - |  | - | 2 | 1 | - | - | - | 172 |
| Thyasiridae | - | - | - | - | 1 | - | - |  | - | - | - | 1 | - | - |  | - | - | - | 1 | 1 | 11 | 15 |
| Turbinidae | - | - | - | - | - | - | - |  | 1 | - | - | - | - | - |  | - | - | - | - | - | - | 1 |
| Yoldiidae | - | - | - | - | - | - | - |  | - | 1 | - | 8 | - | 2 |  | - | - | 16 | 1 | - | 1 | 29 |
| Total | 4 | 28 | 7 | 2 | 3 | 2 | 2 |  | 576 | 6 | 1 | 189 | 5 | 135 |  | 1 | 15 | 61 | 22 | 34 | 42 | 1135 |

Supplementary Table 4. Mollusca family composition at Steinahóll vent fields. *: hydrothermally influenced sample.
